# Supplementary material for: Associations between cerebrospinal fluid markers and cognition in ageing and dementia: A systematic review
Source: PubMed Central journal article supplement (PMC9790745; doi:10.1111/ejn.15656), 2022-05-12
Supplement: EJN-56-5650-s001.pdf [file EJN-56-5650-s001.pdf]

Supplementary Table 1: Search terms

|    |                                              |
|----|----------------------------------------------|
| 1  | exp Dementia/ (159151)                       |
| 2  | dementia.tw. (99204)                         |
| 3  | dementia.mp. (118365)                        |
| 4  | exp Alzheimer Disease/ (90082)               |
| 5  | Alzheimer's disease.mp. (111260)             |
| 6  | Alzheimer's disease.tw. (108060)             |
| 7  | Alzheimer.mp. (99838)                        |
| 8  | Alzheimer.tw. (25566)                        |
| 9  | early onset alzheimer.tw. (162)              |
| 10 | late onset alzheimer.tw. (333)               |
| 11 | early onset alzheimer.mp. (168)              |
| 12 | late onset alzheimer.mp. (340)               |
| 13 | alzheimer dementia.mp. (621)                 |
| 14 | alzheimer dementia.tw. (594)                 |
| 15 | dementia alzheimer.mp. (208)                 |
| 16 | dementia alzheimer.tw. (197)                 |
| 17 | alzheimer type dementia.mp. (713)            |
| 18 | alzheimer type dementia.tw. (710)            |
| 19 | dementia alzheimer type.mp. (51)             |
| 20 | dementia alzheimer type.tw. (51)             |
| 21 | exp Frontotemporal Dementia/ (2957)          |
| 22 | fronto?temporal dementia.mp. (6629)          |
| 23 | fronto?temporal dementia.tw. (5813)          |
| 24 | (dementia adj5 lewy bod*).tw. (4649)         |
| 25 | (dementia adj5 lewy bod*).mp. (4761)         |
| 26 | dementia with lewy bodies.mp. (3786)         |
| 27 | dementia with lewy bodies.tw. (3693)         |
| 28 | exp Dementia, Vascular/ (6467)               |
| 29 | vascular dementia.mp. (6197)                 |
| 30 | vascular dementia.tw. (5995)                 |
| 31 | dementia senile.mp. (42)                     |
| 32 | dementia senile.tw. (32)                     |
| 33 | senile dementia.mp. (2839)                   |
| 34 | senile dementia.tw. (2828)                   |
| 35 | senile dementia alzheimer type.mp. (27)      |
| 36 | senile dementia alzheimer type.tw. (27)      |
| 37 | Alzheimer type senile dementia.mp. (23)      |
| 38 | alzheimer type senile dementia.tw. (23)      |
| 39 | dementia primary senile degenerative.mp. (1) |
| 40 | disease alzheimer.mp. (129)                  |
| 41 | disease alzheimer.tw. (129)                  |
| 42 | alzheimer disease.mp. (95803)                |
| 43 | alzheimer disease.tw. (15402)                |
| 44 | familial alzheimer disease.mp. (309)         |
| 45 | familial alzheimer disease.tw. (305)         |
| 46 | sporadic alzheimer disease.mp. (155)         |
| 47 | sporadic alzheimer disease.tw. (153)         |
| 48 | exp Cognitive Dysfunction/ (14131)           |
| 49 | mild cognitive impairment.mp. (15263)        |
| 50 | cognitive dysfunction.mp. (25698)            |
| 51 | cognitive dysfunction.tw. (12358)            |
| 52 | mild cognitive impairment.tw. (14658)        |
| 53 | cognitive impairment.mp. (52889)             |
| 54 | cognitive impairment.tw. (51378)             |
| 55 | cognitive decline.mp. (20005)                |
| 56 | cognitive decline.tw. (19666)                |

|     |                                                |
|-----|------------------------------------------------|
| 57  | exp Cognition/ (153665)                        |
| 58  | exp Memory/ (131781)                           |
| 59  | exp "Mental Status and Dementia Tests"/ (7153) |
| 60  | mini-mental state examination.mp. (12525)      |
| 61  | mini-mental state examination.tw. (12420)      |
| 62  | exp Neuropsychological Tests/ (172797)         |
| 63  | RBANS.mp. (429)                                |
| 64  | RBANS.tw. (420)                                |
| 65  | exp Cognitive Aging/ (514)                     |
| 66  | cognitive aging.mp. (2371)                     |
| 67  | cognitive aging.tw. (1664)                     |
| 68  | cognitive ageing.mp. (287)                     |
| 69  | cognitive ageing.tw. (246)                     |
| 70  | age related cognitive decline.mp. (1152)       |
| 71  | age related cognitive decline.tw. (1142)       |
| 72  | neurodegenerati*.mp. (107535)                  |
| 73  | neurodegenerati*.tw. (99625)                   |
| 74  | exp Cerebrospinal Fluid/ (18386)               |
| 75  | cerebrospinal fluid.mp. (113892)               |
| 76  | cerebrospinal fluid.tw. (81799)                |
| 77  | CSF.mp. (95526)                                |
| 78  | CSF.tw. (94530)                                |
| 79  | exp Neurofilament Proteins/ (5269)             |
| 80  | neurofilament light chain.mp. (418)            |
| 81  | neurofilament light chain.tw. (405)            |
| 82  | neurofilament light polypeptide.mp. (48)       |
| 83  | neurofilament light polypeptide.tw. (48)       |
| 84  | NEFL.mp. (187)                                 |
| 85  | NEFL.tw. (185)                                 |
| 86  | NFL.mp. (1473)                                 |
| 87  | NFL.tw. (1444)                                 |
| 88  | neurofilament.mp. (10782)                      |
| 89  | neurofilament.tw. (8901)                       |
| 90  | neurofilament light.mp. (877)                  |
| 91  | neurofilament light.tw. (864)                  |
| 92  | light polypeptide.mp. (427)                    |
| 93  | light polypeptide.tw. (405)                    |
| 94  | exp Neurogranin/ (273)                         |
| 95  | neurogranin.mp. (426)                          |
| 96  | neurogranin.tw. (377)                          |
| 97  | RC3.mp. (190)                                  |
| 98  | RC3.tw. (190)                                  |
| 99  | p17.mp. (2213)                                 |
| 100 | p17.tw. (2039)                                 |
| 101 | BICKS.mp. (20)                                 |
| 102 | BICKS.tw. (20)                                 |
| 103 | protein kinase C substrate.mp. (356)           |
| 104 | protein kinase C substrate.tw. (355)           |
| 105 | NRGN.mp. (184)                                 |
| 106 | NRGN.tw. (64)                                  |
| 107 | exp Synaptosomal-Associated Protein 25/ (1614) |
| 108 | synaptosom* associated protein 25.mp. (1742)   |
| 109 | synaptosom* associated protein 25.tw. (270)    |
| 110 | exp GAP-43 Protein/ (2364)                     |
| 111 | GAP-43.mp. (3042)                              |
| 112 | GAP-43.tw. (2184)                              |
| 113 | growth associated protein 43.mp. (1198)        |
| 114 | growth associated protein 43.tw. (1179)        |

|     |                                                                                                                                                                                                                                                                                                                             |
|-----|-----------------------------------------------------------------------------------------------------------------------------------------------------------------------------------------------------------------------------------------------------------------------------------------------------------------------------|
| 115 | protein F1.mp. (125)                                                                                                                                                                                                                                                                                                        |
| 116 | protein F1.tw. (124)                                                                                                                                                                                                                                                                                                        |
| 117 | neuromodulin.mp. (170)                                                                                                                                                                                                                                                                                                      |
| 118 | neuromodulin.tw. (166)                                                                                                                                                                                                                                                                                                      |
| 119 | neural phosphoprotein B-50.mp. (1)                                                                                                                                                                                                                                                                                          |
| 120 | exp Calmodulin/ (14092)                                                                                                                                                                                                                                                                                                     |
| 121 | calmodulin.mp. (43103)                                                                                                                                                                                                                                                                                                      |
| 122 | calmodulin.tw. (29083)                                                                                                                                                                                                                                                                                                      |
| 123 | exp Calcium-Calmodulin-Dependent Protein Kinases/ (18328)                                                                                                                                                                                                                                                                   |
| 124 | exp Calmodulin-Binding Proteins/ (5522)                                                                                                                                                                                                                                                                                     |
| 125 | calmodulin dependent protein kinase.mp. (8786)                                                                                                                                                                                                                                                                              |
| 126 | calmodulin dependent protein kinase.tw. (5682)                                                                                                                                                                                                                                                                              |
| 127 | calmodulin binding protein.mp. (541)                                                                                                                                                                                                                                                                                        |
| 128 | calmodulin binding protein.tw. (535)                                                                                                                                                                                                                                                                                        |
| 129 | (synap* protein adj5 cogniti*).mp. [mp=title, abstract, original title, name of substance word, subject heading word, floating sub-heading word, keyword heading word, organism supplementary concept word, protocol supplementary concept word, rare disease supplementary concept word, unique identifier, synonyms] (15) |
| 130 | (synap* protein adj5 cogniti*).tw. (15)                                                                                                                                                                                                                                                                                     |
| 131 | (synap* protein adj15 dementia).mp. (9)                                                                                                                                                                                                                                                                                     |
| 132 | (synap* protein adj15 dementia).tw. (9)                                                                                                                                                                                                                                                                                     |
| 133 | (synap* protein adj15 cerebrospinal fluid).mp. (6)                                                                                                                                                                                                                                                                          |
| 134 | (synap* protein adj15 cerebrospinal fluid).tw. (6)                                                                                                                                                                                                                                                                          |
| 135 | SNAP25.mp. (1378)                                                                                                                                                                                                                                                                                                           |
| 136 | SNAP25.tw. (567)                                                                                                                                                                                                                                                                                                            |
| 137 | synap* protein.mp. (1465)                                                                                                                                                                                                                                                                                                   |
| 138 | synap* protein.tw. (1446)                                                                                                                                                                                                                                                                                                   |
| 139 | synap* marker.mp. (290)                                                                                                                                                                                                                                                                                                     |
| 140 | synap* marker.tw. (287)                                                                                                                                                                                                                                                                                                     |
| 141 | or/1-73 (693628)                                                                                                                                                                                                                                                                                                            |
| 142 | or/74-78 (165537)                                                                                                                                                                                                                                                                                                           |
| 143 | or/79-140 (67285)                                                                                                                                                                                                                                                                                                           |
| 144 | 141 and 142 and 143 (470)                                                                                                                                                                                                                                                                                                   |

Supplementary Table 2: National Institute of Health Quality Assessment Tool for Observational Cohort and Cross-Sectional Studies ratings for included studies

| Study                      | Was the research question or objective in this paper clearly stated? | Was the study population clearly specified and defined? | Was the participant rate of eligible persons at least 50%? | Were all the participants selected or recruited from the same or similar populations (including the same time period)? Were inclusion/exclusion criteria prespecified and applied uniformly? | Was a sample size justification, power description, or variance effect estimates provided? | For the analyses, were the exposure(s) of interest measured prior to the outcome(s) being measured? | Was the timeframe sufficient so that one could reasonably expect to see an association between exposure and outcome if it existed? | For exposures that can vary in amount or level, did the study examine different levels of the exposure as related to the outcome? | Were the exposure measures clearly defined, valid, reliable, and implemented consistently across all participants? | Was the exposure assessed more than once over time? | Were the outcome measures clearly defined, valid, reliable, and implemented consistently across all participants? | Were the outcome assessors blinded to the exposure status of participants? | Was loss to follow-up after baseline 20% or less? | Were key potential confounding variables measured and adjusted for statistically? | Quality Rating |
|----------------------------|----------------------------------------------------------------------|---------------------------------------------------------|------------------------------------------------------------|----------------------------------------------------------------------------------------------------------------------------------------------------------------------------------------------|--------------------------------------------------------------------------------------------|-----------------------------------------------------------------------------------------------------|------------------------------------------------------------------------------------------------------------------------------------|-----------------------------------------------------------------------------------------------------------------------------------|--------------------------------------------------------------------------------------------------------------------|-----------------------------------------------------|-------------------------------------------------------------------------------------------------------------------|----------------------------------------------------------------------------|---------------------------------------------------|-----------------------------------------------------------------------------------|----------------|
| Abu-Rumeileh et al. (2018) | Y                                                                    | Y                                                       | NR                                                         | Y                                                                                                                                                                                            | N                                                                                          | N/A                                                                                                 | N/A                                                                                                                                | Y                                                                                                                                 | Y                                                                                                                  | N                                                   | Y                                                                                                                 | Y                                                                          | N/A                                               | Y                                                                                 | Good           |
| Agnello et al. (2020)      | Y                                                                    | Y                                                       | NR                                                         | Y                                                                                                                                                                                            | N                                                                                          | N/A                                                                                                 | N/A                                                                                                                                | Y                                                                                                                                 | Y                                                                                                                  | N                                                   | Y                                                                                                                 | NR                                                                         | N/A                                               | N                                                                                 | Fair           |
| Alcolea et al. (2017)      | Y                                                                    | Y                                                       | NR                                                         | N                                                                                                                                                                                            | N                                                                                          | N/A                                                                                                 | N/A                                                                                                                                | Y                                                                                                                                 | N                                                                                                                  | N                                                   | Y                                                                                                                 | NR                                                                         | N/A                                               | Y                                                                                 | Fair           |
| Aschenbrenner 2020         | Y                                                                    | Y                                                       | NR                                                         | Y                                                                                                                                                                                            | N                                                                                          | Y                                                                                                   | N/A                                                                                                                                | Y                                                                                                                                 | Y                                                                                                                  | Y                                                   | Y                                                                                                                 | NR                                                                         | N                                                 | Y                                                                                 | Good           |
| Bartos et al. (2012)       | Y                                                                    | Y                                                       | NR                                                         | Y                                                                                                                                                                                            | N                                                                                          | N/A                                                                                                 | N/A                                                                                                                                | Y                                                                                                                                 | Y                                                                                                                  | N                                                   | Y                                                                                                                 | NR                                                                         | N/A                                               | NR                                                                                | Fair           |
| Begcevic et al. (2020)     | Y                                                                    | Y                                                       | NR                                                         | Y                                                                                                                                                                                            | N                                                                                          | N/A                                                                                                 | N/A                                                                                                                                | Y                                                                                                                                 | Y                                                                                                                  | N                                                   | Y                                                                                                                 | NR                                                                         | N/A                                               | N                                                                                 | Fair           |
| Bendlin et al. (2012)      | Y                                                                    | Y                                                       | NR                                                         | Y                                                                                                                                                                                            | N                                                                                          | N/A                                                                                                 | N/A                                                                                                                                | Y                                                                                                                                 | Y                                                                                                                  | N                                                   | Y                                                                                                                 | NR                                                                         | N/A                                               | Y                                                                                 | Fair           |
| Bjerke et al. (2009)       | Y                                                                    | Y                                                       | NR                                                         | N                                                                                                                                                                                            | N                                                                                          | N/A                                                                                                 | N/A                                                                                                                                | Y                                                                                                                                 | Y                                                                                                                  | N                                                   | Y                                                                                                                 | Y                                                                          | N/A                                               | Y                                                                                 | Good           |
| Boiten et al. (2021)       | Y                                                                    | Y                                                       | NR                                                         | Y                                                                                                                                                                                            | N                                                                                          | CD                                                                                                  | N/A                                                                                                                                | Y                                                                                                                                 | Y                                                                                                                  | N                                                   | Y                                                                                                                 | CD                                                                         | N/A                                               | Y                                                                                 | Fair           |
| Bos et al. (2019)          | Y                                                                    | Y                                                       | NR                                                         | Y                                                                                                                                                                                            | N                                                                                          | N/A                                                                                                 | N/A                                                                                                                                | Y                                                                                                                                 | Y                                                                                                                  | Y                                                   | Y                                                                                                                 | Y                                                                          | N/A                                               | Y                                                                                 | Good           |
| Brinkmalm et al. (2014)    | Y                                                                    | Y                                                       | NR                                                         | N                                                                                                                                                                                            | N                                                                                          | N/A                                                                                                 | N/A                                                                                                                                | Y                                                                                                                                 | Y                                                                                                                  | N                                                   | Y                                                                                                                 | NR                                                                         | N/A                                               | NR                                                                                | Fair           |
| Bruno et al. (2020)        | Y                                                                    | N                                                       | NR                                                         | CD                                                                                                                                                                                           | N                                                                                          | N                                                                                                   | N/A                                                                                                                                | Y                                                                                                                                 | Y                                                                                                                  | N                                                   | Y                                                                                                                 | NR                                                                         | N/A                                               | N                                                                                 | Fair           |
| Casaleto et al. (2017)     | Y                                                                    | Y                                                       | NR                                                         | Y                                                                                                                                                                                            | N                                                                                          | N/A                                                                                                 | N/A                                                                                                                                | Y                                                                                                                                 | Y                                                                                                                  | N                                                   | Y                                                                                                                 | Y                                                                          | N/A                                               | Y                                                                                 | Good           |
| Chatterjee et al. (2018)   | Y                                                                    | Y                                                       | NR                                                         | Y                                                                                                                                                                                            | N                                                                                          | N/A                                                                                                 | N/A                                                                                                                                | Y                                                                                                                                 | Y                                                                                                                  | N                                                   | Y                                                                                                                 | Y                                                                          | N/A                                               | Y                                                                                 | Good           |
| deJong et al. (2007)       | Y                                                                    | N                                                       | NR                                                         | CD                                                                                                                                                                                           | N                                                                                          | N/A                                                                                                 | N/A                                                                                                                                | Y                                                                                                                                 | Y                                                                                                                  | N                                                   | Y                                                                                                                 | NR                                                                         | N/A                                               | Y                                                                                 | Fair           |
| Delaby et al. (2020)       | Y                                                                    | Y                                                       | NR                                                         | Y                                                                                                                                                                                            | N                                                                                          | N                                                                                                   | N/A                                                                                                                                | Y                                                                                                                                 | Y                                                                                                                  | N                                                   | Y                                                                                                                 | NR                                                                         | N/A                                               | Y                                                                                 | Fair           |
| DeVos et al. (2016)        | Y                                                                    | N                                                       | NR                                                         | CD                                                                                                                                                                                           | N                                                                                          | N/A                                                                                                 | N/A                                                                                                                                | Y                                                                                                                                 | Y                                                                                                                  | Y                                                   | Y                                                                                                                 | NR                                                                         | N/A                                               | Y                                                                                 | Fair           |

| Study                      | Was the research question or objective in this paper clearly stated? | Was the study population clearly specified and defined? | Was the participant rate of eligible persons at least 50%? | Were all the participants selected or recruited from the same or similar populations (including the same time period)? Were inclusion/exclusion criteria prespecified and applied uniformly? | Was a sample size justification, power description, or variance effect estimates provided? | For the analyses, were the exposure(s) of interest measured prior to the outcome(s) being measured? | Was the timeframe sufficient so that one could reasonably expect to see an association between exposure and outcome if it existed? | For exposures that can vary in amount or level, did the study examine different levels of the exposure as related to the outcome? | Were the exposure measures clearly defined, valid, reliable, and implemented consistently across all participants? | Was the exposure assessed more than once over time? | Were the outcome measures clearly defined, valid, reliable, and implemented consistently across all participants? | Were the outcome assessors blinded to the exposure status of participants? | Was loss to follow-up after baseline 20% or less? | Were key potential confounding variables measured and adjusted for statistically? | Quality Rating |
|----------------------------|----------------------------------------------------------------------|---------------------------------------------------------|------------------------------------------------------------|----------------------------------------------------------------------------------------------------------------------------------------------------------------------------------------------|--------------------------------------------------------------------------------------------|-----------------------------------------------------------------------------------------------------|------------------------------------------------------------------------------------------------------------------------------------|-----------------------------------------------------------------------------------------------------------------------------------|--------------------------------------------------------------------------------------------------------------------|-----------------------------------------------------|-------------------------------------------------------------------------------------------------------------------|----------------------------------------------------------------------------|---------------------------------------------------|-----------------------------------------------------------------------------------|----------------|
| Dhiman et al. (2020)       | Y                                                                    | Y                                                       | NR                                                         | Y                                                                                                                                                                                            | N                                                                                          | CD                                                                                                  | N/A                                                                                                                                | Y                                                                                                                                 | Y                                                                                                                  | N                                                   | Y                                                                                                                 | NR                                                                         | N/A                                               | Y                                                                                 | Fair           |
| Galasko et al. (2019)      | Y                                                                    | Y                                                       | NR                                                         | CD                                                                                                                                                                                           | N                                                                                          | N/A                                                                                                 | N/A                                                                                                                                | Y                                                                                                                                 | Y                                                                                                                  | N                                                   | Y                                                                                                                 | Y                                                                          | N/A                                               | Y                                                                                 | Good           |
| Gifford et al. (2018)      | Y                                                                    | Y                                                       | N                                                          | Y                                                                                                                                                                                            | N                                                                                          | N/A                                                                                                 | N/A                                                                                                                                | Y                                                                                                                                 | Y                                                                                                                  | N                                                   | Y                                                                                                                 | Y                                                                          | N/A                                               | Y                                                                                 | Good           |
| Headley et al. (2018)      | Y                                                                    | Y                                                       | NR                                                         | Y                                                                                                                                                                                            | N                                                                                          | N/A                                                                                                 | N/A                                                                                                                                | Y                                                                                                                                 | Y                                                                                                                  | N                                                   | Y                                                                                                                 | NR                                                                         | N/A                                               | Y                                                                                 | Fair           |
| Hellwig et al. (2015)      | Y                                                                    | Y                                                       | NR                                                         | Y                                                                                                                                                                                            | N                                                                                          | N/A                                                                                                 | N/A                                                                                                                                | Y                                                                                                                                 | Y                                                                                                                  | N                                                   | Y                                                                                                                 | Y                                                                          | N/A                                               | CD                                                                                | Fair           |
| Hoglund et al. (2015)      | Y                                                                    | Y                                                       | Y                                                          | Y                                                                                                                                                                                            | N                                                                                          | Y                                                                                                   | N/A                                                                                                                                | Y                                                                                                                                 | Y                                                                                                                  | N                                                   | Y                                                                                                                 | NR                                                                         | N/A                                               | Y                                                                                 | Fair           |
| Jia et al. (2020)          | Y                                                                    | N                                                       | NR                                                         | N                                                                                                                                                                                            | N                                                                                          | N/A                                                                                                 | N/A                                                                                                                                | Y                                                                                                                                 | Y                                                                                                                  | N                                                   | Y                                                                                                                 | Y                                                                          | N/A                                               | CD                                                                                | Fair           |
| Kirsebom et al. (2018)     | Y                                                                    | Y                                                       | NR                                                         | N                                                                                                                                                                                            | N                                                                                          | N/A                                                                                                 | N/A                                                                                                                                | Y                                                                                                                                 | Y                                                                                                                  | Y                                                   | Y                                                                                                                 | NR                                                                         | N/A                                               | Y                                                                                 | Fair           |
| Kvartsberg et al. (2015)   | Y                                                                    | Y                                                       | NR                                                         | CD                                                                                                                                                                                           | N                                                                                          | N/A                                                                                                 | N/A                                                                                                                                | Y                                                                                                                                 | Y                                                                                                                  | Y                                                   | Y                                                                                                                 | Y                                                                          | N/A                                               | Y                                                                                 | Good           |
| Lee et al. (2008)          | Y                                                                    | N                                                       | NR                                                         | CD                                                                                                                                                                                           | N                                                                                          | N/A                                                                                                 | N/A                                                                                                                                | Y                                                                                                                                 | Y                                                                                                                  | N                                                   | Y                                                                                                                 | NR                                                                         | N/A                                               | CD                                                                                | Poor           |
| Lim et al. (2019)          | Y                                                                    | Y                                                       | NR                                                         | Y                                                                                                                                                                                            | N                                                                                          | N/A                                                                                                 | N/A                                                                                                                                | Y                                                                                                                                 | Y                                                                                                                  | N                                                   | Y                                                                                                                 | CD                                                                         | N/A                                               | N                                                                                 | Fair           |
| Mattsson et al. (2016)     | Y                                                                    | Y                                                       | NR                                                         | CD                                                                                                                                                                                           | N                                                                                          | N/A                                                                                                 | N/A                                                                                                                                | Y                                                                                                                                 | Y                                                                                                                  | Y                                                   | Y                                                                                                                 | NR                                                                         | N/A                                               | Y                                                                                 | Good           |
| McGuire et al. (2015)      | Y                                                                    | Y                                                       | NR                                                         | Y                                                                                                                                                                                            | N                                                                                          | N/A                                                                                                 | N/A                                                                                                                                | Y                                                                                                                                 | Y                                                                                                                  | Y                                                   | Y                                                                                                                 | NR                                                                         | N/A                                               | N                                                                                 | Fair           |
| Meeter et al. (2016)       | Y                                                                    | Y                                                       | NR                                                         | Y                                                                                                                                                                                            | N                                                                                          | N/A                                                                                                 | N/A                                                                                                                                | Y                                                                                                                                 | Y                                                                                                                  | N                                                   | Y                                                                                                                 | NR                                                                         | N/A                                               | Y                                                                                 | Fair           |
| Meeter et al. (2018)       | Y                                                                    | Y                                                       | NR                                                         | Y                                                                                                                                                                                            | N                                                                                          | N/A                                                                                                 | N/A                                                                                                                                | Y                                                                                                                                 | Y                                                                                                                  | N                                                   | Y                                                                                                                 | Y                                                                          | N/A                                               | Y                                                                                 | Good           |
| Meeter et al. (2019)       | Y                                                                    | Y                                                       | NR                                                         | N                                                                                                                                                                                            | N                                                                                          | N/A                                                                                                 | N/A                                                                                                                                | Y                                                                                                                                 | Y                                                                                                                  | Y                                                   | N                                                                                                                 | NR                                                                         | N/A                                               | Y                                                                                 | Fair           |
| Meeter et al. (2017)       | Y                                                                    | N                                                       | NR                                                         | CD                                                                                                                                                                                           | N                                                                                          | N/A                                                                                                 | N/A                                                                                                                                | Y                                                                                                                                 | Y                                                                                                                  | N                                                   | Y                                                                                                                 | NR                                                                         | N/A                                               | Y                                                                                 | Fair           |
| Mielke et al. (2019a)      | Y                                                                    | Y                                                       | NR                                                         | Y                                                                                                                                                                                            | N                                                                                          | N/A                                                                                                 | N/A                                                                                                                                | Y                                                                                                                                 | Y                                                                                                                  | N                                                   | N                                                                                                                 | NR                                                                         | N/A                                               | Y                                                                                 | Fair           |
| Mielke et al. (2019b)      | Y                                                                    | Y                                                       | NR                                                         | Y                                                                                                                                                                                            | N                                                                                          | CD                                                                                                  | N/A                                                                                                                                | Y                                                                                                                                 | Y                                                                                                                  | N                                                   | Y                                                                                                                 | NR                                                                         | N/A                                               | Y                                                                                 | Good           |
| Mouton-Liger et al. (2020) | Y                                                                    | Y                                                       | NR                                                         | Y                                                                                                                                                                                            | N                                                                                          | CD                                                                                                  | N/A                                                                                                                                | Y                                                                                                                                 | Y                                                                                                                  | N                                                   | Y                                                                                                                 | Y                                                                          | N/A                                               | Y                                                                                 | Good           |
| Oeckl et al. (2020)        | Y                                                                    | Y                                                       | NR                                                         | Y                                                                                                                                                                                            | N                                                                                          | N                                                                                                   | N/A                                                                                                                                | Y                                                                                                                                 | Y                                                                                                                  | N                                                   | N                                                                                                                 | Y                                                                          | N/A                                               | Y                                                                                 | Fair           |

| Study                     | Was the research question or objective in this paper clearly stated? | Was the study population clearly specified and defined? | Was the participant rate of eligible persons at least 50%? | Were all the participants selected or recruited from the same or similar populations (including the same time period)? Were inclusion/exclusion criteria prespecified and applied uniformly? | Was a sample size justification, power description, or variance effect estimates provided? | For the analyses, were the exposure(s) of interest measured prior to the outcome(s) being measured? | Was the timeframe sufficient so that one could reasonably expect to see an association between exposure and outcome if it existed? | For exposures that can vary in amount or level, did the study examine different levels of the exposure as related to the outcome? | Were the exposure measures clearly defined, valid, reliable, and implemented consistently across all participants? | Was the exposure assessed more than once over time? | Were the outcome measures clearly defined, valid, reliable, and implemented consistently across all participants? | Were the outcome assessors blinded to the exposure status of participants? | Was loss to follow-up after baseline 20% or less? | Were key potential confounding variables measured and adjusted for statistically? | Quality Rating |
|---------------------------|----------------------------------------------------------------------|---------------------------------------------------------|------------------------------------------------------------|----------------------------------------------------------------------------------------------------------------------------------------------------------------------------------------------|--------------------------------------------------------------------------------------------|-----------------------------------------------------------------------------------------------------|------------------------------------------------------------------------------------------------------------------------------------|-----------------------------------------------------------------------------------------------------------------------------------|--------------------------------------------------------------------------------------------------------------------|-----------------------------------------------------|-------------------------------------------------------------------------------------------------------------------|----------------------------------------------------------------------------|---------------------------------------------------|-----------------------------------------------------------------------------------|----------------|
| Ohrfelt et al. (2016)     | Y                                                                    | Y                                                       | NR                                                         | Y                                                                                                                                                                                            | N                                                                                          | N/A                                                                                                 | N/A                                                                                                                                | Y                                                                                                                                 | Y                                                                                                                  | N                                                   | Y                                                                                                                 | CD                                                                         | N/A                                               | N                                                                                 | Fair           |
| Ohrfelt et al. (2019)     | Y                                                                    | N                                                       | NR                                                         | CD                                                                                                                                                                                           | N                                                                                          | CD                                                                                                  | N/A                                                                                                                                | Y                                                                                                                                 | Y                                                                                                                  | CD                                                  | Y                                                                                                                 | CD                                                                         | N/A                                               | Yes                                                                               | Fair           |
| Osborn et al. (2019)      | Y                                                                    | Y                                                       | N/A                                                        | Y                                                                                                                                                                                            | N                                                                                          | N/A                                                                                                 | N/A                                                                                                                                | Y                                                                                                                                 | Y                                                                                                                  | N                                                   | Y                                                                                                                 | Y                                                                          | N/A                                               | Y                                                                                 | Good           |
| Portelius et al. (2015)   | Y                                                                    | Y                                                       | NR                                                         | Y                                                                                                                                                                                            | N                                                                                          | N/A                                                                                                 | N/A                                                                                                                                | Y                                                                                                                                 | Y                                                                                                                  | N                                                   | Y                                                                                                                 | NR                                                                         | N/A                                               | Y                                                                                 | Fair           |
| Racine et al. (2016)      | Y                                                                    | Y                                                       | NR                                                         | Y                                                                                                                                                                                            | N                                                                                          | N/A                                                                                                 | N/A                                                                                                                                | Y                                                                                                                                 | Y                                                                                                                  | N                                                   | Y                                                                                                                 | NR                                                                         | N/A                                               | Y                                                                                 | Fair           |
| Rojas et al. (2018)       | Y                                                                    | Y                                                       | Y                                                          | Y                                                                                                                                                                                            | N                                                                                          | N/A                                                                                                 | N/A                                                                                                                                | Y                                                                                                                                 | Y                                                                                                                  | N                                                   | Y                                                                                                                 | NR                                                                         | N/A                                               | Y                                                                                 | Fair           |
| Rolstad et al. (2015a)    | Y                                                                    | Y                                                       | NR                                                         | Y                                                                                                                                                                                            | N                                                                                          | N/A                                                                                                 | N/A                                                                                                                                | Y                                                                                                                                 | Y                                                                                                                  | N                                                   | Y                                                                                                                 | NR                                                                         | N                                                 | Y                                                                                 | Fair           |
| Rolstad et al. (2015b)    | Y                                                                    | Y                                                       | N                                                          | Y                                                                                                                                                                                            | N                                                                                          | N/A                                                                                                 | N/A                                                                                                                                | Y                                                                                                                                 | Y                                                                                                                  | N                                                   | Y                                                                                                                 | Y                                                                          | N/A                                               | Y                                                                                 | Good           |
| Sancesario et al. (2020)  | Y                                                                    | Y                                                       | NR                                                         | Y                                                                                                                                                                                            | N                                                                                          | CD                                                                                                  | N/A                                                                                                                                | Y                                                                                                                                 | Y                                                                                                                  | N                                                   | Y                                                                                                                 | Y                                                                          | N/A                                               | Y                                                                                 | Good           |
| Sandelius et al. (2019)   | Y                                                                    | N                                                       | NR                                                         | Y                                                                                                                                                                                            | N                                                                                          | N/A                                                                                                 | N/A                                                                                                                                | Y                                                                                                                                 | Y                                                                                                                  | N                                                   | Y                                                                                                                 | Y                                                                          | N/A                                               | CD                                                                                | Fair           |
| Sanfilippo et al. (2016)  | Y                                                                    | N                                                       | NR                                                         | Y                                                                                                                                                                                            | N                                                                                          | N/A                                                                                                 | N/A                                                                                                                                | Y                                                                                                                                 | Y                                                                                                                  | N                                                   | Y                                                                                                                 | Y                                                                          | N/A                                               | CD                                                                                | Fair           |
| Santillo et al. (2019)    | N                                                                    | N                                                       | NR                                                         | Y                                                                                                                                                                                            | N                                                                                          | N/A                                                                                                 | N/A                                                                                                                                | Y                                                                                                                                 | Y                                                                                                                  | N                                                   | Y                                                                                                                 | NR                                                                         | N/A                                               | Y                                                                                 | Poor           |
| Scherling et al. (2014)   | Y                                                                    | N                                                       | NR                                                         | Y                                                                                                                                                                                            | N                                                                                          | N/A                                                                                                 | N/A                                                                                                                                | Y                                                                                                                                 | Y                                                                                                                  | N                                                   | Y                                                                                                                 | NR                                                                         | N/A                                               | CD                                                                                | Poor           |
| Schindler et al. (2019)   | Y                                                                    | Y                                                       | NR                                                         | Y                                                                                                                                                                                            | N                                                                                          | N/A                                                                                                 | N/A                                                                                                                                | Y                                                                                                                                 | Y                                                                                                                  | Y                                                   | Y                                                                                                                 | NR                                                                         | N/A                                               | Y                                                                                 | Fair           |
| Sjogren et al. (2001)     | Y                                                                    | Y                                                       | NR                                                         | Y                                                                                                                                                                                            | N                                                                                          | N/A                                                                                                 | N/A                                                                                                                                | Y                                                                                                                                 | Y                                                                                                                  | N                                                   | Y                                                                                                                 | NR                                                                         | N/A                                               | Y                                                                                 | Fair           |
| Sjogren et al. (2000)     | Y                                                                    | Y                                                       | NR                                                         | Y                                                                                                                                                                                            | N                                                                                          | N/A                                                                                                 | N/A                                                                                                                                | Y                                                                                                                                 | Y                                                                                                                  | N                                                   | Y                                                                                                                 | Y                                                                          | N/A                                               | Y                                                                                 | Fair           |
| Skillback et al. (2014)   | Y                                                                    | Y                                                       | NR                                                         | Y                                                                                                                                                                                            | N                                                                                          | Y                                                                                                   | N/A                                                                                                                                | Y                                                                                                                                 | Y                                                                                                                  | N                                                   | Y                                                                                                                 | Y                                                                          | N/A                                               | Y                                                                                 | Good           |
| Sun et al. (2016)         | Y                                                                    | N                                                       | NR                                                         | CD                                                                                                                                                                                           | N                                                                                          | N/A                                                                                                 | N/A                                                                                                                                | Y                                                                                                                                 | Y                                                                                                                  | N                                                   | Y                                                                                                                 | CD                                                                         | N/A                                               | Y                                                                                 | Fair           |
| Swanson et al., (2016)    | Y                                                                    | N                                                       | NR                                                         | Y                                                                                                                                                                                            | N                                                                                          | N/A                                                                                                 | N/A                                                                                                                                | Y                                                                                                                                 | Y                                                                                                                  | N                                                   | Y                                                                                                                 | CD                                                                         | N/A                                               | Y                                                                                 | Fair           |
| Teitsdottir et al. (2020) | Y                                                                    | Y                                                       | NR                                                         | Y                                                                                                                                                                                            | N                                                                                          | N/A                                                                                                 | N/A                                                                                                                                | Y                                                                                                                                 | Y                                                                                                                  | N                                                   | Y                                                                                                                 | NR                                                                         | N/A                                               | Y                                                                                 | Fair           |
| VanDerEnde et al. (2020)  | Y                                                                    | Y                                                       | NR                                                         | Y                                                                                                                                                                                            | Y                                                                                          | Y                                                                                                   | N/A                                                                                                                                | Y                                                                                                                                 | Y                                                                                                                  | N                                                   | Y                                                                                                                 | Y                                                                          | N/A                                               | Y                                                                                 | Good           |

| Study                       | Was the research question or objective in this paper clearly stated? | Was the study population clearly specified and defined? | Was the participant rate of eligible persons at least 50%? | Were all the participants selected or recruited from the same or similar populations (including the same time period)? Were inclusion/exclusion criteria prespecified and applied uniformly? | Was a sample size justification, power description, or variance effect estimates provided? | For the analyses, were the exposure(s) of interest measured prior to the outcome(s) being measured? | Was the timeframe sufficient so that one could reasonably expect to see an association between exposure and outcome if it existed? | For exposures that can vary in amount or level, did the study examine different levels of the exposure as related to the outcome? | Were the exposure measures clearly defined, valid, reliable, and implemented consistently across all participants? | Was the exposure assessed more than once over time? | Were the outcome measures clearly defined, valid, reliable, and implemented consistently across all participants? | Were the outcome assessors blinded to the exposure status of participants? | Was loss to follow-up after baseline 20% or less? | Were key potential confounding variables measured and adjusted for statistically? | Quality Rating |
|-----------------------------|----------------------------------------------------------------------|---------------------------------------------------------|------------------------------------------------------------|----------------------------------------------------------------------------------------------------------------------------------------------------------------------------------------------|--------------------------------------------------------------------------------------------|-----------------------------------------------------------------------------------------------------|------------------------------------------------------------------------------------------------------------------------------------|-----------------------------------------------------------------------------------------------------------------------------------|--------------------------------------------------------------------------------------------------------------------|-----------------------------------------------------|-------------------------------------------------------------------------------------------------------------------|----------------------------------------------------------------------------|---------------------------------------------------|-----------------------------------------------------------------------------------|----------------|
| Van Steenoven et al. (2020) | Y                                                                    | Y                                                       | NR                                                         | Y                                                                                                                                                                                            | N                                                                                          | N                                                                                                   | N/A                                                                                                                                | Y                                                                                                                                 | Y                                                                                                                  | N                                                   | Y                                                                                                                 | Y                                                                          | N/A                                               | Y                                                                                 | Good           |
| Wang et al. (2019)          | Y                                                                    | Y                                                       | NR                                                         | Y                                                                                                                                                                                            | N                                                                                          | N/A                                                                                                 | N/A                                                                                                                                | Y                                                                                                                                 | Y                                                                                                                  | N                                                   | Y                                                                                                                 | NR                                                                         | N/A                                               | Y                                                                                 | Fair           |
| Wang et al. (2018)          | Y                                                                    | Y                                                       | NR                                                         | Y                                                                                                                                                                                            | N                                                                                          | N/A                                                                                                 | N/A                                                                                                                                | Y                                                                                                                                 | Y                                                                                                                  | N                                                   | Y                                                                                                                 | NR                                                                         | N/A                                               | N                                                                                 | Fair           |
| Wellington et al. (2016)    | Y                                                                    | Y                                                       | NR                                                         | Y                                                                                                                                                                                            | N                                                                                          | N/A                                                                                                 | N/A                                                                                                                                | Y                                                                                                                                 | Y                                                                                                                  | N                                                   | Y                                                                                                                 | Y                                                                          | N/A                                               | N                                                                                 | Fair           |
| Xiao et al. (2017)          | Y                                                                    | N                                                       | NR                                                         | Y                                                                                                                                                                                            | N                                                                                          | N/A                                                                                                 | N/A                                                                                                                                | Y                                                                                                                                 | Y                                                                                                                  | N                                                   | Y                                                                                                                 | Y                                                                          | N/A                                               | N                                                                                 | Fair           |
| Zetterberg et al. (2016)    | Y                                                                    | Y                                                       | NR                                                         | Y                                                                                                                                                                                            | N                                                                                          | N/A                                                                                                 | N/A                                                                                                                                | Y                                                                                                                                 | Y                                                                                                                  | N                                                   | Y                                                                                                                 | Y                                                                          | N/A                                               | Y                                                                                 | Good           |
| Zhang et al. (2018a)        | Y                                                                    | Y                                                       | NR                                                         | Y                                                                                                                                                                                            | N                                                                                          | N/A                                                                                                 | N/A                                                                                                                                | Y                                                                                                                                 | Y                                                                                                                  | N                                                   | Y                                                                                                                 | CD                                                                         | N/A                                               | Y                                                                                 | Fair           |
| Zhang et al. (2018b)        | Y                                                                    | Y                                                       | NR                                                         | Y                                                                                                                                                                                            | N                                                                                          | N/A                                                                                                 | N/A                                                                                                                                | Y                                                                                                                                 | Y                                                                                                                  | N                                                   | Y                                                                                                                 | CD                                                                         | N/A                                               | Y                                                                                 | Fair           |
